# Supplementary material
Source: PubMed Central journal article supplement (PMC3479588)
Supplement: 1209372109_pnas.201209372SI.pdf [file 1209372109_pnas.201209372SI.pdf]

# Supporting Information

Walsh et al. 10.1073/pnas.1209372109

**Table S1. List of up-regulated genes in B-cell of *Tlr7*tg mice (>twofold)**

| Biological function                 | Gene symbol                                                                           | Protein name                                                                             |
|-------------------------------------|---------------------------------------------------------------------------------------|------------------------------------------------------------------------------------------|
| Lymphocyte signaling                | <i>Cd38</i>                                                                           | CD38 antigen                                                                             |
|                                     | <i>Sp3</i>                                                                            | transacting transcription factor 3                                                       |
|                                     | <i>Syk</i>                                                                            | spleen tyrosine kinase                                                                   |
|                                     | <i>Sh3bp5</i>                                                                         | SH3-domain binding protein 5 (BTK-associated)                                            |
|                                     | <i>Ptpnc</i>                                                                          | protein tyrosine phosphatase, receptor type, C                                           |
|                                     | <i>Slamf1</i>                                                                         | signaling lymphocytic activation molecule family member 1                                |
|                                     | <i>Impdh2</i>                                                                         | inosine 5'-phosphate dehydrogenase 2                                                     |
| Antigen processing and presentation | <i>Dock2</i>                                                                          | dedicator of cyto-kinesis 2                                                              |
|                                     | <i>H2-B1</i>                                                                          | histocompatibility 2, blastocyst                                                         |
|                                     | <i>H2-K1</i>                                                                          | histocompatibility 2, K1, K region                                                       |
|                                     | <i>H2-M3</i>                                                                          | histocompatibility 2, M region locus 3                                                   |
|                                     | <i>H2-Q7</i>                                                                          | histocompatibility 2, Q region locus 7                                                   |
|                                     | <i>Psmb9</i>                                                                          | proteasome (prosome, macropain) subunit, beta type 9 (large multifunctional peptidase 2) |
|                                     | <i>Tap1</i>                                                                           | transporter 1, ATP-binding cassette, subfamily B (MDR/TAP)                               |
| Transcription                       | <i>Ciita</i>                                                                          | class II transactivator                                                                  |
|                                     | <i>Mef2c</i>                                                                          | myocyte enhancer factor 2C                                                               |
|                                     | <i>Ncor1</i>                                                                          | nuclear receptor corepressor 1                                                           |
|                                     | <i>Pgr</i>                                                                            | progesterone receptor                                                                    |
|                                     | <i>Spib</i>                                                                           | Spi-B transcription factor (Spi-1/PU.1 related)                                          |
| RNA-binding                         | <i>Ewsr1</i>                                                                          | Ewing sarcoma breakpoint region 1                                                        |
|                                     | <i>Hnrnpa1</i>                                                                        | heterogeneous nuclear ribonucleoprotein A1                                               |
|                                     | <i>Hnrpdl</i>                                                                         | heterogeneous nuclear ribonucleoprotein d-like                                           |
|                                     | <i>Mbnl1</i>                                                                          | muscleblind-like 1 ( <i>Drosophila</i> )                                                 |
|                                     | <i>Msi2</i>                                                                           | Musashi homolog 2 ( <i>Drosophila</i> )                                                  |
|                                     | <i>Nova1</i>                                                                          | neuro-oncological ventral antigen 1                                                      |
|                                     | <i>Raver1</i>                                                                         | ribonucleoprotein, PTB-binding 1                                                         |
|                                     | <i>Rbmxt</i>                                                                          | RNA binding motif protein, X chromosome retrogene                                        |
|                                     | <i>Son</i>                                                                            | Son DNA binding protein                                                                  |
| Cell cycle                          | <i>Rap1a</i>                                                                          | Rap1a RAS-related protein-1a                                                             |
|                                     | <i>Casp3</i>                                                                          | caspase 3                                                                                |
|                                     | <i>Lig1</i>                                                                           | ligase I, DNA, ATP-dependent                                                             |
|                                     | <i>Tfdp1</i>                                                                          | transcription factor Dp 1                                                                |
|                                     | <i>Hcls1</i>                                                                          | hematopoietic cell specific Lyn substrate 1                                              |
| IFN inducible                       | <i>Igtp</i>                                                                           | IFN gamma induced GTPase                                                                 |
|                                     | <i>Stat1</i>                                                                          | signal transducer and activator of transcription 1                                       |
|                                     | <i>Gvin1</i>                                                                          | GTPase, very large IFN inducible 1                                                       |
| Ig                                  | <i>Igh-6</i>                                                                          | Ig heavy chain 6 (heavy chain of IgM)                                                    |
|                                     | <i>Igk-C</i>                                                                          | Ig kappa chain C region. [Source:Uniprot/SWISSPROT;Acc:P01837]                           |
|                                     | <i>Igj</i>                                                                            | Ig joining chain                                                                         |
|                                     | AI324046                                                                              | mouse IgG-3 constant chain, expressed sequence AI324046 (AI324046), mRNA                 |
|                                     | LOC630242                                                                             | PREDICTED: similar to Ig heavy chain V region MC101 precursor (LOC630242), mRNA          |
|                                     | LOC544900                                                                             | PREDICTED: similar to Ig heavy chain V region PJ14 precursor (LOC544900), mRNA           |
|                                     | LOC629863                                                                             | PREDICTED: similar to Ig heavy chain V region 108A precursor (LOC629863), mRNA           |
|                                     | LOC668497                                                                             | PREDICTED: similar to Ig heavy chain V-I region V35 precursor (LOC668497), mRNA          |
|                                     | LOC211331                                                                             | PREDICTED: similar to Ig heavy chain V region 93G7 precursor (LOC211331), mRNA           |
|                                     | LOC382695                                                                             | PREDICTED: similar to Ig heavy chain V region VH558 A1/A4 precursor (LOC382695), mRNA    |
|                                     | LOC380823                                                                             | PREDICTED: similar to Ig heavy chain V region B1-8/186-2 precursor (LOC380823), mRNA     |
|                                     | LOC380824                                                                             | PREDICTED: similar to Ig heavy chain V region VH558 A1/A4 precursor (LOC380824), mRNA    |
|                                     | LOC673286                                                                             | PREDICTED: similar to Ig heavy chain V region 102 precursor (LOC673286), mRNA            |
| LOC673498                           | PREDICTED: similar to Ig heavy chain V region VH558 A1/A4 precursor (LOC673498), mRNA |                                                                                          |
